# Supplementary material for: Long-term outcomes after curative endoscopic submucosal dissection vs. gastrectomy in late elderly patients aged ≥75 years with early gastric cancer
Source: Research Square preprint supplement (doi:10.21203/rs.3.rs-7689469/v1), 2025-10-30
Supplement: Supplementary file 1 [file e8c09cb1cb7f24610c20363d.docx]

**Supplementary materials**

**Long-term outcomes after curative endoscopic submucosal dissection vs. gastrectomy in late elderly patients aged ≥75 years with early gastric cancer**

**Table of Contents**

**List of the Korean elderly ESD study group**………………………………………..3

**Supplementary Tables**

Table S1. Curative resection criteria of endoscopic resection for early gastric cancer on the final pathological evaluation in the Korean Practice Guidelines for Gastric Cancer……………………………………………………………………………….5

Table S2. Gastric cancer recurrence and treatment …………………………………………….6

Table S3. Risk factors associated with overall mortality and gastric cancer recurrence in univariate analyses ………………………………………………………………7

**List of the Korean elderly ESD study group**

| Name | Affiliation |
| --- | --- |
| Seokin Kang | Department of Internal Medicine, Ilsan Paik Hospital, Inje University College of Medicine, Goyang, Korea |
| Sun Moon Kim | Department of Internal Medicine, College of Medicine, Konyang University, Daejeon, Korea |
| Sung Eun Kim | Department of Internal Medicine, Kosin University College of Medicine, Busan, Korea |
| Seung Han Kim | Division of Gastroenterology, Department of Internal Medicine, Korea University Guro Hospital, Korea University College of Medicine, Seoul, Korea |
| Young-Il Kim | Center for Gastric Cancer, National Cancer Center, Goyang, Korea |
| Joon Sung Kim | Department of Internal Medicine, Incheon St. Mary’s Hospital, College of Medicine, The Catholic University of Korea, Seoul, Korea |
| Byung-Hoon Min | Department of Medicine, Samsung Medical Center, Sungkyunkwan University of School of Medicine, Seoul, Korea |
| Seon-Young Park | Department of Internal Medicine, Chonnam National University Medical School, Gwangju, Korea |
| Jae Myung Park | Department of Internal Medicine, Seoul St. Mary’s Hospital, The Catholic University of Korea College of Medicine, Seoul, Korea |
| Jae Yong Park | Division of Gastroenterology, Department of Internal Medicine, Chung-Ang University College of Medicine, Seoul, Korea |
| Chan Hyuk Park | Department of Internal Medicine, Chung-Ang University H.C.S. Hyundae Hospital, Namyangju, Korea |
| Bong Eun Lee | Department of Internal Medicine, Pusan National University School of Medicine, Busan, Korea |
| Seung-Woo Lee | Division of Gastroenterology, Department of Internal Medicine, Daejeon St. Mary’s Hospital, College of Medicine, The Catholic University of Korea, Seoul, Korea |
| Ayoung Lee | Division of Gastroenterology, Department of Internal Medicine, Korea University College of Medicine, Seoul, Korea |
| Jeong Hoon Lee | Department of Gastroenterology, University of Ulsan College of Medicine, Asan Medical Center, Seoul, Korea |
| Hyun Lim | Department of Internal Medicine, Hallym University Sacred Heart Hospital, University of Hallym College of Medicine, Anyang, Korea |
| Da Hyun Jung | Department of Internal Medicine, Yonsei University College of Medicine, Seoul, Korea |
| Hyunsoo Chung | Department of Internal Medicine and Liver Research Institute, Seoul National University College of Medicine, Seoul, Korea |
| Hyeong Ho Jo | Department of Internal Medicine, Daegu Catholic University School of Medicine, Daegu, Korea |
| Sam Ryong Jee | Department of Internal Medicine, Busan Paik Hospital, Inje University College of Medicine, Busan, Korea |
| Yonghoon Choi | Department of Internal Medicine, Seoul National University Bundang Hospital, Seongnam, Korea |
| Chung Hyun Tae | Department of Internal Medicine, Ewha Womans University College of Medicine, Seoul, Korea |
| Hwoon-Yong Jung | Department of Gastroenterology, University of Ulsan College of Medicine, Asan Medical Center, Seoul, Korea |

**Supplementary tables**

Table S1. Curative resection criteria of endoscopic resection for early gastric cancer on the final pathological evaluation in the Korean Practice Guidelines for Gastric Cancer

| Criteria | Pathological findings* |
| --- | --- |
| Absolute | Mucosal tumor of size ≤ 2 cm, differentiated histologic type without ulcer |
| Expanded I | Mucosal tumor of size > 2 cm, differentiated histologic type without ulcer |
| Expanded II | Mucosal tumor of size ≤ 3 cm, differentiated histologic type with ulcer |
| Expanded III | Mucosal tumor of size ≤ 2 cm, undifferentiated histologic type without ulcer |
| Expanded IV | Submucosal tumor (invasion ≤ 500 um) of size ≤ 3 cm, differentiated histologic type |
| *All gastric cancers are resected with negative resection margins, and have no lymphatic invasion as well as venous invasion. | |

Table S2. Gastric cancer recurrence and treatment

|  | Treatment group | |
| --- | --- | --- |
|  | ESD | Surgery |
|  | (no=4,083) | (no=158) |
| Total recurrence, no (%) | 248 (6.1) | 1 (0.6) |
| Local recurrence | 52 (1.3) | 0 (0) |
| Metachronous recurrence | 190 (4.7) | 0 (0) |
| Distant recurrence | 6 (0.1) | 1 (0.1) |
| Treatment of recurrence, no/total no (%) | |  |
| Local recurrence |  |  |
| Endoscopy therapy* | 37/52 (71.2) | NA |
| Surgery | 9/52 (17.3) | NA |
| Observation | 4/52 (7.7) | NA |
| Follow-up loss | 2/52 (3.8) | NA |
| Metachronous recurrence |  |  |
| Endoscopy therapy* | 159/190 (83.7) | NA |
| Surgery | 19/190 (10.0) | NA |
| Observation | 10/190 (5.3) | NA |
| Follow-up loss | 2/190 (1.1) | NA |
| Extra-gastric recurrence |  |  |
| Surgery | 1/6 (16.7) | NA |
| Systemic chemotherapy | 3/6 (50.0) | NA |
| Surgery with chemotherapy | 1/6 (16.7) | NA |
| Observation | 1/6 (16.7) | 1/1 (100) |
| Abbreviations: ESD, endoscopic submucosal dissection; NA, not applicable. | | |
| *Endoscopic therapy included endoscopic resection or argon plasma coaculation. | | |

Table S3. Risk factors associated with overall mortality and gastric cancer recurrence in univariate analyses*

|  |  | Overall mortality† | | | Gastric cancer recurrence‡ | | |
| --- | --- | --- | --- | --- | --- | --- | --- |
|  | Total no. | cHR | 95% CI | *P* | cHR | 95% CI | *P* |
| Treatment |  |  |  |  |  |  |  |
| Surgery | 158 | 1.00 |  |  | 1.00 |  |  |
| ESD | 632 | 0.89 | 0.69-1.16 | 0.397 | 19.41 | 2.47-152.78 | 0.005 |
| Age group |  |  |  |  |  |  |  |
| 75~79 years | 545 | 1.00 |  |  | 1.00 |  |  |
| 80~84 years | 206 | 1.88 | 1.42-2.49 | <0.001 | 1.88 | 1.42-2.49 | <0.001 |
| 85 years ~ | 39 | 3.92 | 2.50-6.14 | <0.001 | 3.92 | 2.50-6.14 | <0.001 |
| Sex |  |  |  |  |  |  |  |
| Female | 324 | 1.00 |  |  | 1.00 |  |  |
| Male | 466 | 1.56 | 1.19-2.05 | 0.001 | 1.09 | 0.55-2.16 | 0.801 |
| Hypertension | 513 | 0.98 | 0.75-1.28 | 0.874 | 1.23 | 0.59-2.56 | 0.572 |
| Diabetes mellitus | 201 | 1.30 | 0.98-1.74 | 0.070 | 0.59 | 0.24-1.42 | 0.238 |
| Cardiovascular disease | 88 | 0.97 | 0.62-1.50 | 0.881 | 0.44 | 0.10-1.89 | 0.273 |
| Cerebrovascular disease | 78 | 1.36 | 0.91-2.01 | 0.131 | 1.19 | 0.43-3.28 | 0.735 |
| Chronic liver disease | 11 | 3.52 | 1.65-7.49 | 0.001 | NA |  |  |
| Chronic lung disease | 50 | 1.54 | 0.98-2.44 | 0.064 | 1.22 | 0.36-4.09 | 0.751 |
| Chronic kidney disease | 68 | 1.66 | 0.12-2.47 | 0.012 | 0.37 | 0.05-2.72 | 0.331 |
| Other malignancy | 66 | 1.64 | 1.08-2.48 | 0.019 | NA | - | - |
| ASA PS score |  |  |  |  |  |  |  |
| 1 | 93 | 1.00 |  |  | 1.00 |  |  |
| 2 | 531 | 1.97 | 1.18-3.29 | 0.009 | 1.13 | 0.35-3.70 | 0.837 |
| 3 or higher | 166 | 1.93 | 1.09-3.43 | 0.024 | 0.71 | 0.17-2.95 | 0.643 |
| Tumor histologic type |  |  |  |  |  |  |  |
| Differentiated type | 690 | 1.00 |  |  | 1.00 |  |  |
| Undifferentiated type | 100 | 0.81 | 0.53-1.22 | 0.306 | 0.37 | 0.09-1.54 | 0.171 |
| Tumor location |  |  |  |  |  |  |  |
| Lower 1/3 | 532 | 1.00 |  |  | 1.00 |  |  |
| Middle 1/3 | 209 | 1.14 | 0.86-1.52 | 0.359 | 0.81 | 0.36-1.80 | 0.605 |
| Upper 1/3 | 49 | 1.32 | 0.83-2.11 | 0.238 | 1.39 | 0.41-4.67 | 0.593 |
| Tumor depth |  |  |  |  |  |  |  |
| Mucosa | 724 | 1.00 |  |  | 1.00 |  |  |
| SM1 | 66 | 1.17 | 0.75-1.84 | 0.485 | 0.71 | 0.17-2.96 | 0.638 |
| Presence of ulcer | 134 | 0.99 | 0.70-1.42 | 0.975 | 0.68 | 0.24-1.90 | 0.457 |
| Curative resection criteria | |  |  |  |  |  |  |
| Absolute | 136 | 1.00 |  |  | 1.00 |  |  |
| Expanded | 654 | 0.78 | 0.57-1.07 | 0.121 | 0.88 | 0.39-2.01 | 0.766 |
| Abbreviations: ESD, endoscopic submucosal dissection; cHR, crude hazard ratio; CI, confidence interval; NA, not applicable; ASA PS, American Society of Anesthesiologist Physical Status. | | | | | | | |
| *The analyses were performed in the propensity score-matched cohort.  †The Cox-proportional hazard regression model was used to evaluate risk factors for the overall mortality.  ‡The Fine-Gray regression model was used to evaluate risk factors for the gastric cancer recurrence. | | | | | | | |
